# Supplementary material
Source: PubMed Central journal article supplement (PMC9254032)

1. Full unedited gel/blot for Figure 4

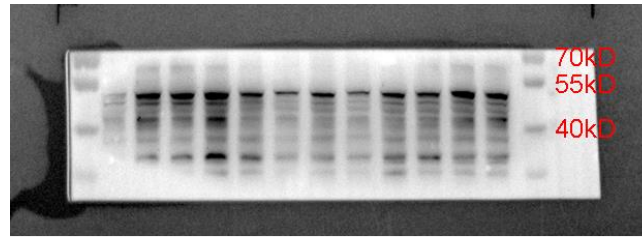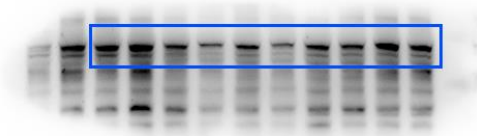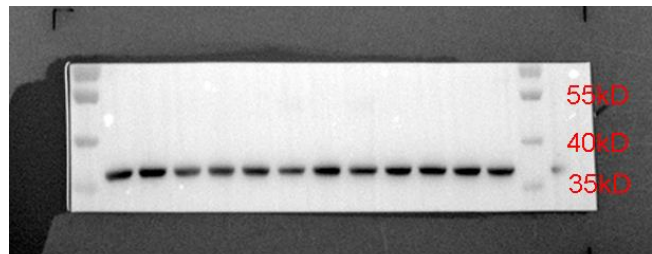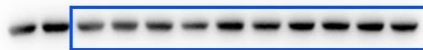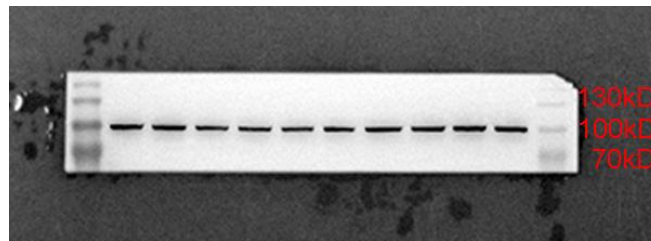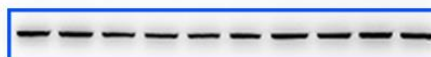

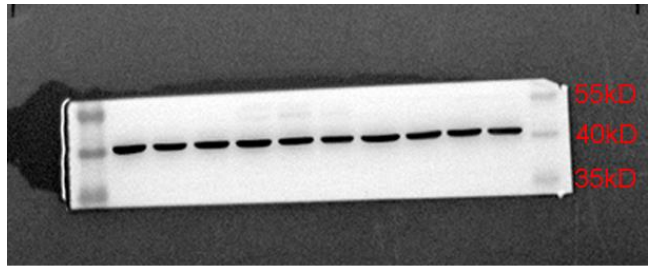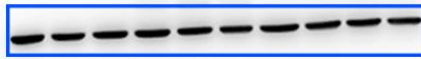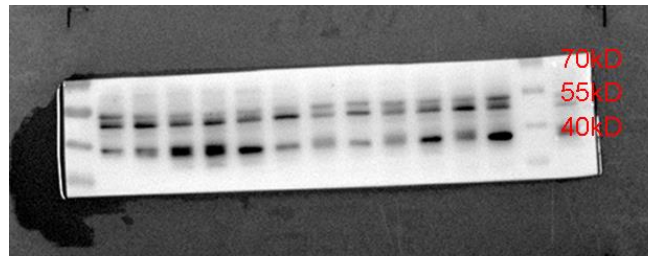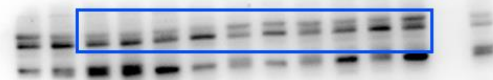

2. Full unedited gel/blot for Figure 5

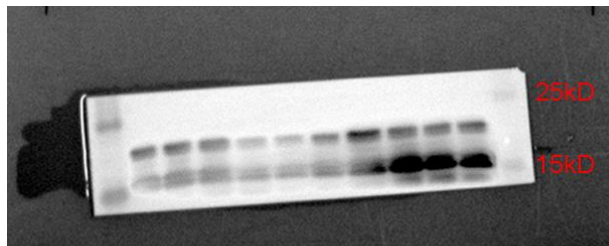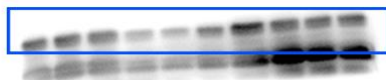

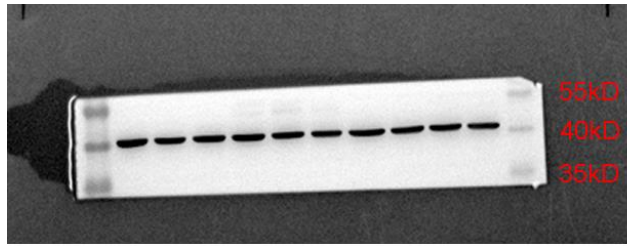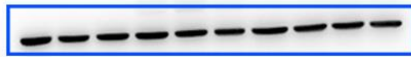

3. Full unedited gel/blot for Figure 6

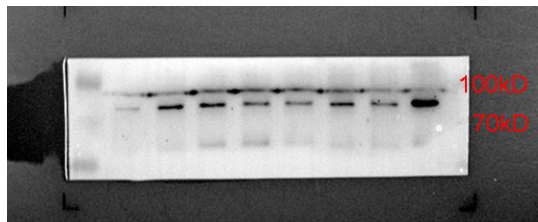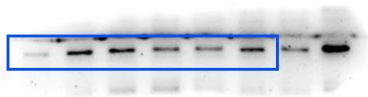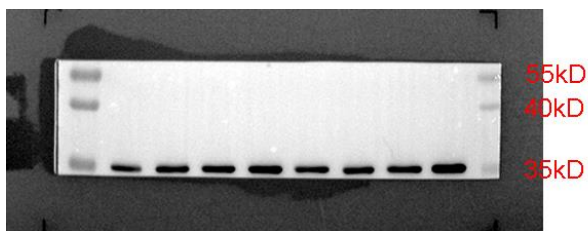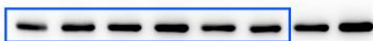

Supplement: sj-pdf-1-jcb-10.1177_0271678X211065391.pdf [file sj-pdf-1-jcb-10.1177_0271678X211065391.pdf]
