# Supplementary material
Source: PubMed Central journal article supplement (PMC9254032)

# Oligodendrocyte precursor cell transplantation promotes angiogenesis and remyelination via Wnt/ $\beta$ -catenin pathway in a mouse model of middle cerebral artery occlusion

Li-Ping Wang<sup>1,2</sup>, Jiaji Pan<sup>2</sup>, Yongfang Li<sup>2</sup>, Jieli Geng<sup>1</sup>, Chang Liu<sup>2</sup>, Lin-Yuan Zhang<sup>2</sup>, Panting Zhou<sup>2</sup>, Yao-Hui Tang<sup>2</sup>, Yongting Wang<sup>2</sup>, Zhijun Zhang<sup>2\*</sup>, and Guo-Yuan Yang<sup>2\*</sup>

## Supplemental 1 OPCs identification and experimental design.

Representative image of MBP (a), NeuN (b), GFAP (c) and Iba-1 (d) in cultured cells. Scale bar=50  $\mu$ m. (e) Diagram of experimental design.

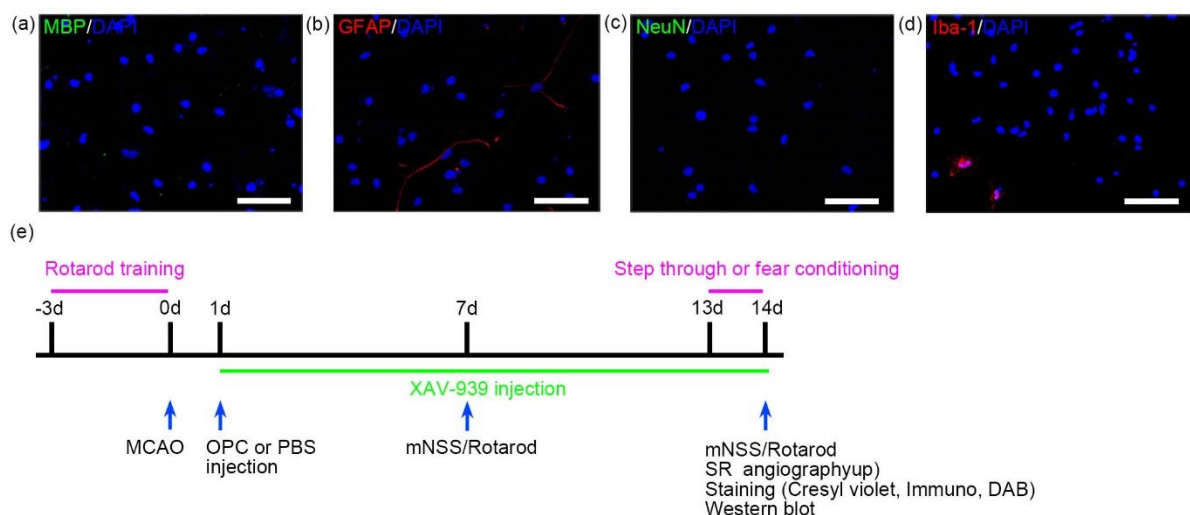

## Supplemental 2 Wnt7a knockdown in OPCs.

(a) Wnt7a FAM-siRNA (green) got into the cell body of the cultured OPCs after 6 hrs of siRNA transfection. Scale bar=50  $\mu$ m. (b) Western blot of the Wnt7a expression in the Blank, NC and SI group. Data are mean $\pm$ SD, n=3 per group, \*\*\* $p$ <0.001, as compared to the Blank group. Blank: without siRNA; NC: with negative control siRNA; SI: with Wnt7a siRNA.

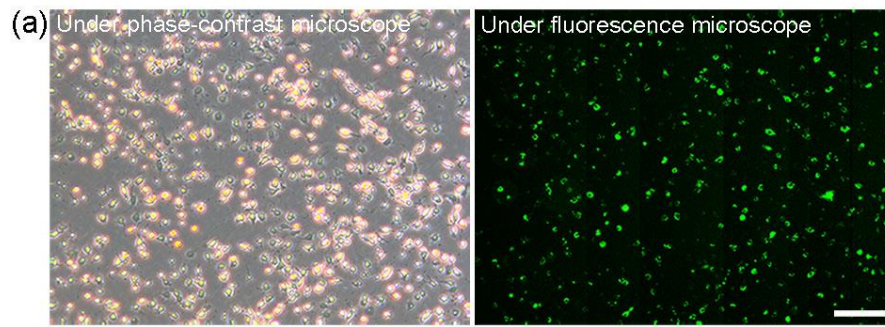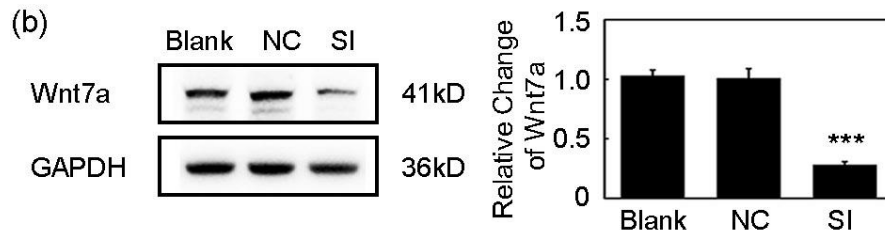

Supplement: sj-pdf-2-jcb-10.1177_0271678X211065391.pdf [file sj-pdf-2-jcb-10.1177_0271678X211065391.pdf]
